# Supplementary material
Source: PubMed Central journal article supplement (PMC2279210)
Supplement: rspb20070670s14.pdf [file rspb20070670s14.pdf]

Table 1. The local exertion length for *Burmeistera* populations in 18 different cloud forest sites. (Nineteen species were present in total, including *B. auriculata* (auri), *B. borjensis* (borj), *B. ceratocarpa* (cera), *B. crassifolia* (cras), *B. crispiloba* (cris), *B. cyclostigmata* (cycl), *B. cylindrocarpa* (cyli), *B. glabrata* (glab), *B. ignimontis* (igni), *B. luto* (luto), *B. multiflora* (mult), *Burmeistera* sp. (sp.)), *B. oyacachensis* (oyac), *B. resupinata* (resu), *B. smaragdi* (smar), *B. sodiroana* (sodi), *B. succulenta* (succ), *B. tenuiflora* (tenu) and *B. truncata* (trun).)

| reserve                 | <i>Burmeistera</i> species present |      |      |      |      |      |      |      |      |      |      |      |      |      |      |      |      |      | no. of spp. |      |
|-------------------------|------------------------------------|------|------|------|------|------|------|------|------|------|------|------|------|------|------|------|------|------|-------------|------|
|                         | auri                               | borj | cera | cras | cris | cycl | cyli | glab | igni | luto | mult | sp.  | oyac | resu | smar | sodi | succ | tenu |             | trun |
| Baeza                   |                                    |      |      |      |      |      |      |      |      |      |      |      |      |      |      |      | 17.5 | 13.2 |             | 2    |
| Bellavista              |                                    |      |      |      |      |      | 14.3 |      |      |      |      |      |      |      |      |      | 20.1 | 11.2 |             | 3    |
| Bilsa                   |                                    |      |      |      |      |      |      |      |      |      |      |      |      |      | 15.6 |      | 27.0 |      |             | 2    |
| Chalpi                  |                                    |      |      |      |      |      |      |      | 26.6 |      |      |      |      |      |      |      | 17.2 |      |             | 2    |
| El Chaco                |                                    | 23.1 | 16.1 |      |      |      |      |      |      |      |      |      |      |      |      |      |      |      |             | 2    |
| Golondrinas             |                                    |      |      |      |      | 28.6 |      |      |      | 11.8 | 16.7 |      |      |      |      |      |      |      |             | 3    |
| Guacamayos              |                                    |      |      |      |      |      |      | 21.5 |      |      |      |      |      |      |      | 15.8 | 13.0 |      |             | 3    |
| Guajalito               |                                    |      |      |      |      |      | 17.8 |      |      |      |      |      |      |      |      |      | 14.1 |      | 23.9        | 3    |
| Lita                    |                                    |      |      | 12.3 |      | 28.1 |      |      |      |      |      |      |      |      |      |      | 14.7 |      |             | 3    |
| Los Cedros              |                                    |      |      |      |      | 26.5 |      |      |      | 11.8 | 16.5 |      |      |      |      |      | 13.0 |      |             | 4    |
| Machalilla              |                                    |      |      |      | 20.8 | 24.3 |      |      |      |      |      |      |      |      |      |      |      |      |             | 2    |
| Maquipucuna             |                                    |      |      |      | 24.2 |      | 16.4 |      |      |      | 16.5 |      |      |      |      |      | 11.3 |      |             | 4    |
| Monteverde              |                                    |      |      |      |      | 28.0 |      |      |      |      |      |      |      |      |      |      |      | 14.9 |             | 2    |
| Otonga                  | 24.3                               |      |      |      |      |      |      |      |      |      |      |      |      |      |      |      | 23.2 | 13.8 |             | 3    |
| Oyacachi                |                                    |      |      |      |      |      |      |      |      |      |      |      | 24.0 |      |      |      | 17.2 |      |             | 2    |
| Pahuma                  |                                    |      |      |      |      |      |      |      |      |      | 18.0 |      |      | 31.7 |      |      |      | 14.4 |             | 3    |
| SierrAzul               |                                    |      | 16.0 |      |      |      |      |      |      |      |      | 24.6 |      |      |      |      |      | 13.0 |             | 3    |
| Yanayacu                |                                    | 23.7 | 15.2 |      |      |      |      |      |      |      |      |      |      |      |      |      | 15.8 | 13.0 |             | 4    |
| no. of popu-<br>lations | 1                                  | 2    | 3    | 1    | 2    | 5    | 3    | 1    | 1    | 2    | 4    | 1    | 1    | 1    | 1    | 8    | 11   | 1    | 1           |      |
